# Supplementary material for: Li5Rb2B7O14: a new congruently melting compound with two kinds of B–O one-dimensional chains and short UV absorption edge
Source: Royal Society of Chemistry journal article supplement (doi:10.1039/c2ce06742k), 2012-01-01
Supplement: c2ce06742k.pdf [file c2ce06742k.pdf]

## Supporting Information

### **Li<sub>5</sub>Rb<sub>2</sub>B<sub>7</sub>O<sub>14</sub>: A New Congruently Melting Compound with Two Kinds of B–O One-dimensional Chains and Short UV Absorption Edge**

Yun Yang,<sup>a</sup> Shilie Pan,<sup>\*a</sup> Xueling Hou,<sup>a</sup> Xiaoyu Dong,<sup>a,b</sup> Xin Su,<sup>a</sup> Zhihua Yang,<sup>a</sup> Wenwu Zhao,<sup>a,b</sup> Min Zhang<sup>a,b</sup>  
and Zhaohui Chen<sup>a</sup>

<sup>a</sup> *Xinjiang Key Laboratory of Electronic Information Materials and Devices, Xinjiang Technical Institute of Physics & Chemistry, Chinese Academy of Sciences, 40-1 South Beijing Road, Urumqi 830011, China;*

<sup>b</sup> *Graduate School of the Chinese Academy of Sciences, Beijing 100039, PR China and College of Chemistry and Chemical Engineering*

**Figure S1.** Powder XRD pattern of  $\text{Li}_5\text{Rb}_2\text{B}_7\text{O}_{14}$ .

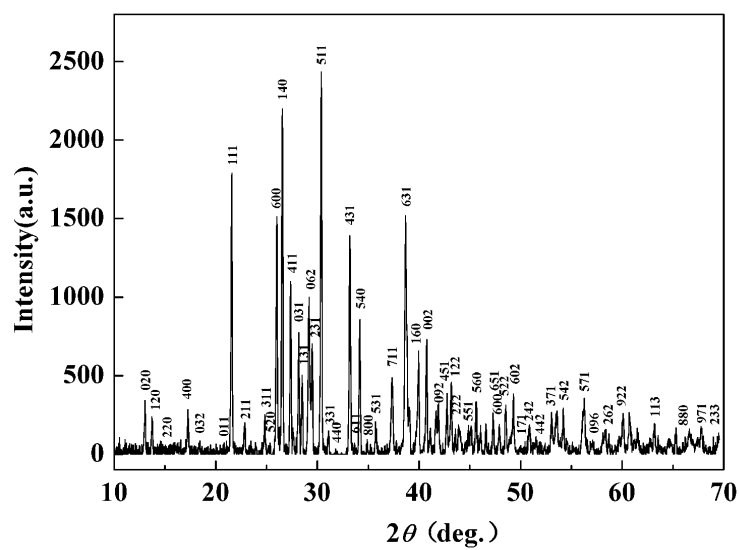

**Figure S2.** Experimental and calculated XRD patterns of the  $\text{Li}_5\text{Rb}_2\text{B}_7\text{O}_{14}$ .

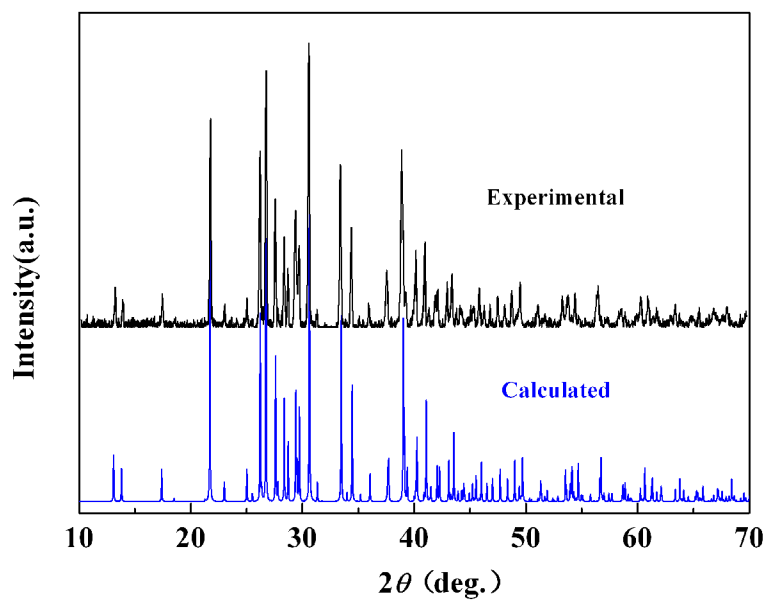

**Figure S3.** Powder XRD pattern of the  $\text{Li}_5\text{Rb}_2\text{B}_7\text{O}_{14}$  samples before and after melting, respectively.

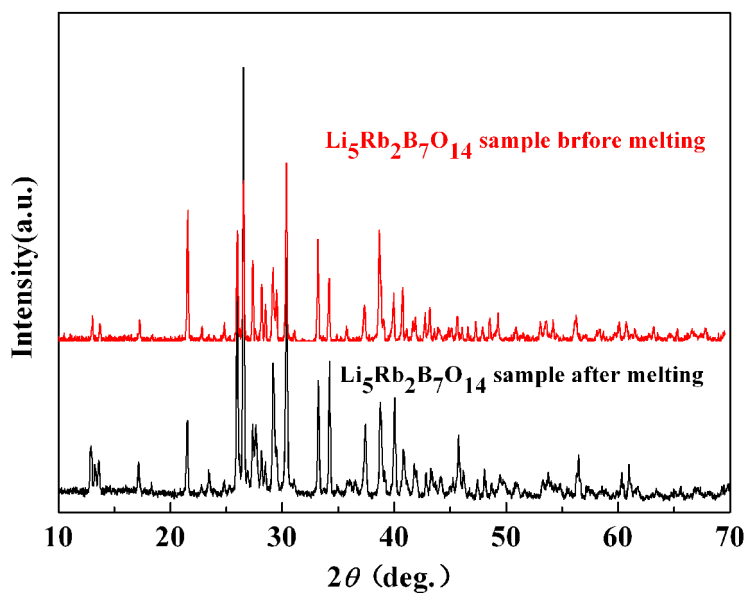

**Figure S4.** A representation of B–O structural building unit down *c* axis.

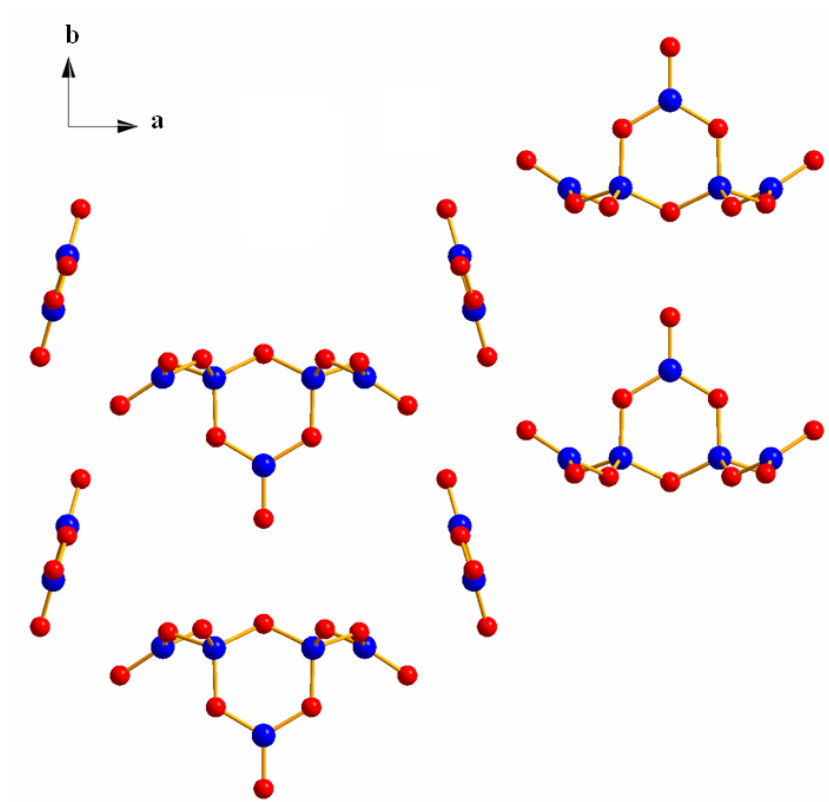

**Figure S5.** View of the structure of  $\text{Li}_5\text{Rb}_2\text{B}_7\text{O}_{14}$  and cations coordination environments down  $c$  axis (orange, Li; green, Rb; blue, B; red, O; purple,  $\text{BO}_4$  group; light blue,  $\text{BO}_3$  group).

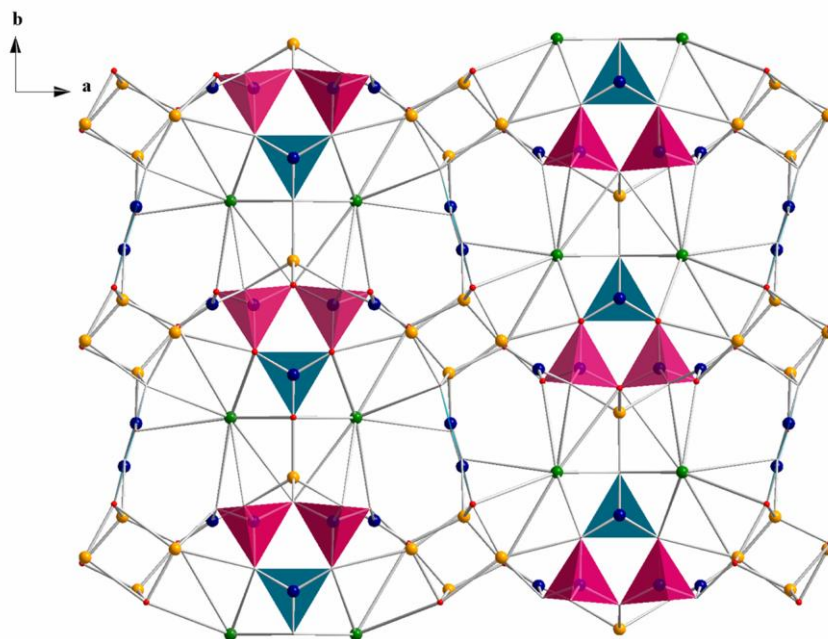

**Figure S6.** Rb(1)O<sub>10</sub> groups are interconnected via sharing edges infinite 1D double chains along *c* axis (green, Rb; red, O).

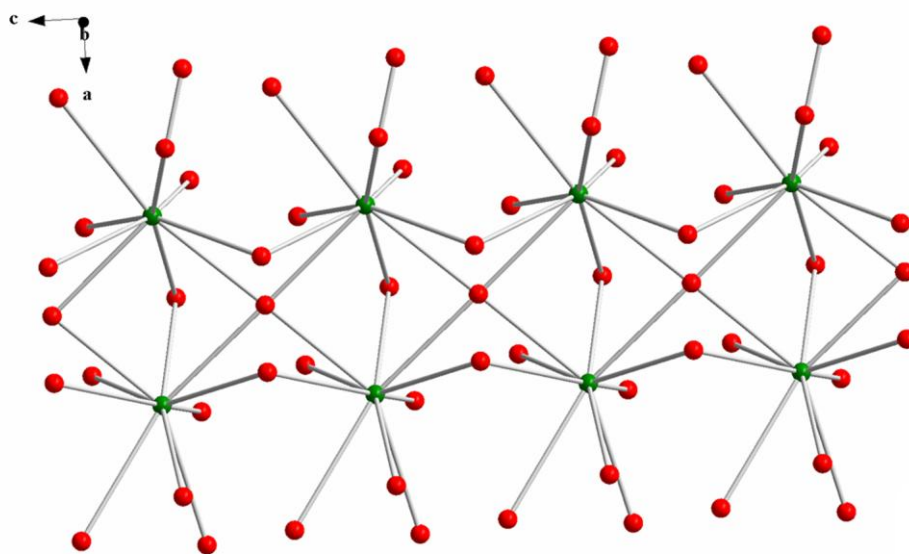

**Figure S7.** Infrared spectroscopy of the  $\text{Li}_5\text{Rb}_2\text{B}_7\text{O}_{14}$  sample.

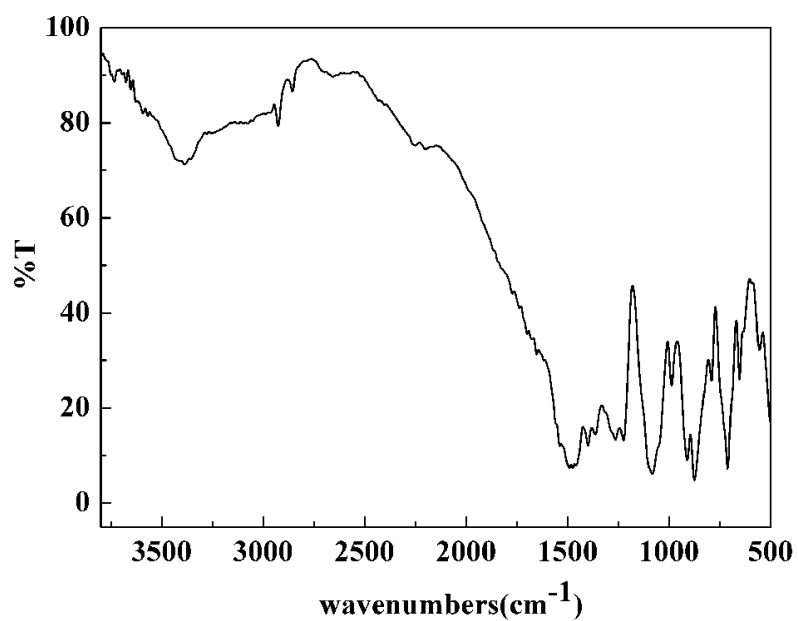



**Figure S8.** UV-VIS-NIR diffuse-reflectance spectrum of  $\text{Li}_5\text{Rb}_2\text{B}_7\text{O}_{14}$ .

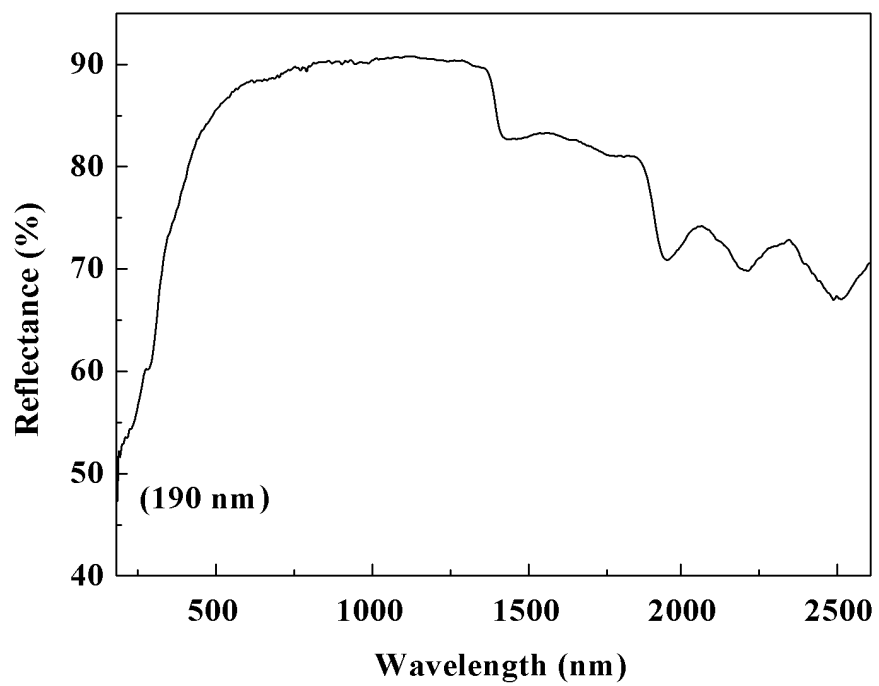

**Figure S9.** Phase matching curve, i.e., particle size vs SHG intensity, data for  $\text{Li}_5\text{Rb}_2\text{B}_7\text{O}_{14}$ . The curve is drawn to guide the eye and is not a fit to the data.

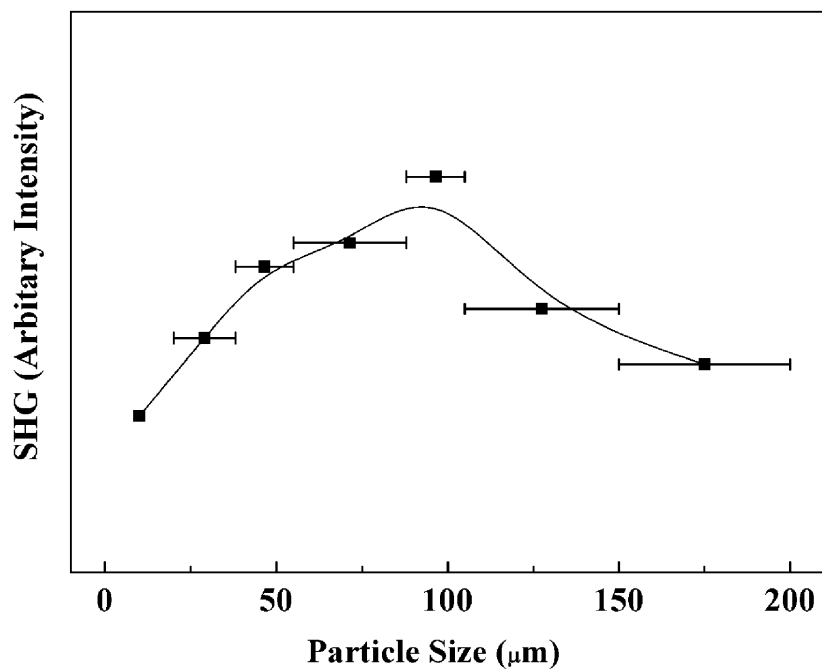

**Table S1.** Selected bond distances (Å) and angles (deg) for Li<sub>5</sub>Rb<sub>2</sub>B<sub>7</sub>O<sub>14</sub>.

|                     |            |                     |           |
|---------------------|------------|---------------------|-----------|
| Rb(1)-O(1)#1        | 2.919(6)   | B(4)-O(5)           | 1.377(6)  |
| Rb(1)-O(1)          | 2.967(6)   | B(4)-O(7)           | 1.345(5)  |
| Rb(1)-O(6)#2        | 2.978(3)   | B(4)-O(6)#1         | 1.394(7)  |
| Rb(1)-O(2)#1        | 3.093(3)   | Li(1)-O(1)          | 1.874(8)  |
| Rb(1)-O(3)          | 3.097(3)   | Li(1)-O(5)#11       | 1.935(8)  |
| Rb(1)-O(2)          | 3.099(3)   | Li(1)-O(5)#12       | 1.935(8)  |
| Rb(1)-O(5)#2        | 3.123(3)   | Li(1)-O(4)#2        | 1.967(18) |
| Rb(1)-O(4)#2        | 3.299(3)   | Li(2)-O(2)          | 2.574(8)  |
| Rb(1)-O(7)          | 3.300(2)   | Li(2)-O(7)          | 1.930(10) |
| Rb(1)#9-O(8)        | 3.336(3)   | Li(2)-O(6)          | 1.958(8)  |
| B(1)-O(1)           | 1.333(6)   | Li(2)-O(8)#7        | 1.912(7)  |
| B(1)-O(2)           | 1.390(4)   | Li(2)-O(8)#8        | 2.387(8)  |
| B(1)-O(2)#6         | 1.390(4)   | Li(2)-O(7)#5        | 2.479(10) |
| B(2)-O(2)           | 1.483(4)   | Li(3)-O(8)          | 1.915(11) |
| B(2)-O(4)           | 1.447(4)   | Li(3)-O(3)#7        | 1.941(7)  |
| B(2)-O(5)           | 1.479(7)   | Li(3)-O(7)#7        | 1.942(6)  |
| B(2)-O(6)           | 1.481(6)   | Li(3)-O(7)#12       | 1.947(6)  |
| B(3)-O(3)           | 1.402(6)   | Li(3)-O(8)#5        | 2.574(11) |
| B(3)-O(8)           | 1.294(5)   | O(1)-Li(1)-O(5)#4   | 117.3(5)  |
| B(3)-O(3)#3         | 1.415(9)   | O(1)-Li(1)-O(5)#5   | 117.3(5)  |
| O(1)#1-Rb(1)-O(1)   | 96.471(12) | O(5)#4-Li(1)-O(5)#5 | 105.1(6)  |
| O(1)#1-Rb(1)-O(6)#2 | 107.55(8)  | O(1)-Li(1)-O(4)#2   | 112.9(8)  |
| O(1)-Rb(1)-O(6)#2   | 84.07(8)   | O(5)#4-Li(1)-O(4)#2 | 100.9(5)  |
| O(1)#1-Rb(1)-O(2)#1 | 46.20(8)   | O(5)#5-Li(1)-O(4)#2 | 100.9(5)  |

---

|                     |            |                      |          |
|---------------------|------------|----------------------|----------|
| O(1)-Rb(1)-O(2)#1   | 111.54(10) | O(8)#9-Li(2)-O(7)    | 106.2(4) |
| O(6)#2-Rb(1)-O(2)#1 | 148.99(8)  | O(8)#9-Li(2)-O(6)    | 143.3(5) |
| O(1)#1-Rb(1)-O(3)   | 146.06(12) | O(7)-Li(2)-O(6)      | 106.5(4) |
| O(1)-Rb(1)-O(3)     | 116.45(12) | O(8)#9-Li(2)-O(8)#10 | 96.5(3)  |
| O(6)#2-Rb(1)-O(3)   | 70.24(7)   | O(7)-Li(2)-O(8)#10   | 97.1(4)  |
| O(2)#1-Rb(1)-O(3)   | 120.25(7)  | O(6)-Li(2)-O(8)#10   | 95.7(3)  |
| O(1)#1-Rb(1)-O(2)   | 111.03(10) | O(8)#9-Li(2)-O(7)#7  | 84.7(3)  |
| O(1)-Rb(1)-O(2)     | 45.82(8)   | O(7)-Li(2)-O(7)#7    | 169.1(4) |
| O(6)#2-Rb(1)-O(2)   | 118.20(8)  | O(6)-Li(2)-O(7)#7    | 63.2(3)  |
| O(2)#1-Rb(1)-O(2)   | 90.30(6)   | O(8)#10-Li(2)-O(7)#7 | 81.3(3)  |
| O(3)-Rb(1)-O(2)     | 98.50(7)   | O(8)#9-Li(2)-O(2)    | 104.4(3) |
| O(1)#1-Rb(1)-O(5)#2 | 65.06(8)   | O(7)-Li(2)-O(2)      | 87.2(3)  |
| O(1)-Rb(1)-O(5)#2   | 104.49(9)  | O(6)-Li(2)-O(2)      | 61.1(2)  |
| O(6)#2-Rb(1)-O(5)#2 | 45.67(6)   | O(8)#10-Li(2)-O(2)   | 156.6(3) |
| O(2)#1-Rb(1)-O(5)#2 | 103.44(8)  | O(7)#7-Li(2)-O(2)    | 90.2(3)  |
| O(3)-Rb(1)-O(5)#2   | 97.02(7)   | O(8)-Li(3)-O(3)#9    | 100.3(3) |
| O(2)-Rb(1)-O(5)#2   | 150.30(7)  | O(8)-Li(3)-O(7)#9    | 101.6(4) |
| O(1)-Rb(1)-O(2)     | 45.82(8)   | O(3)#9-Li(3)-O(7)#9  | 132.2(5) |
| O(6)#2-Rb(1)-O(2)   | 118.20(8)  | O(8)-Li(3)-O(7)#5    | 110.3(4) |
| O(2)#1-Rb(1)-O(2)   | 90.30(6)   | O(3)#9-Li(3)-O(7)#5  | 108.0(3) |
| O(3)-Rb(1)-O(2)     | 98.50(7)   | O(7)#9-Li(3)-O(7)#5  | 103.2(3) |
| O(1)#1-Rb(1)-O(5)#2 | 65.06(8)   | O(8)-Li(3)-O(8)#7    | 155.6(3) |
| O(1)-Rb(1)-O(5)#2   | 104.49(9)  | O(3)#9-Li(3)-O(8)#7  | 60.2(3)  |
| O(6)#2-Rb(1)-O(5)#2 | 45.67(6)   | O(7)#9-Li(3)-O(8)#7  | 84.5(3)  |
| O(2)#1-Rb(1)-O(5)#2 | 103.44(8)  | O(7)#5-Li(3)-O(8)#7  | 90.8(4)  |

---

---

|                     |           |                  |          |
|---------------------|-----------|------------------|----------|
| O(3)-Rb(1)-O(5)#2   | 97.02(7)  | O(1)-B(1)-O(2)#8 | 120.5(2) |
| O(2)-Rb(1)-O(5)#2   | 150.30(7) | O(1)-B(1)-O(2)   | 120.5(2) |
| O(1)#1-Rb(1)-O(4)#2 | 72.18(9)  | O(2)#8-B(1)-O(2) | 119.0(4) |
| O(1)-Rb(1)-O(4)#2   | 61.17(9)  | O(4)-B(2)-O(5)   | 108.6(3) |
| O(6)#2-Rb(1)-O(4)#2 | 45.38(6)  | O(4)-B(2)-O(6)   | 112.8(4) |
| O(2)#1-Rb(1)-O(4)#2 | 117.80(7) | O(5)-B(2)-O(6)   | 106.4(3) |
| O(3)-Rb(1)-O(4)#2   | 115.49(6) | O(4)-B(2)-O(2)   | 112.7(3) |
| O(2)-Rb(1)-O(4)#2   | 106.98(7) | O(5)-B(2)-O(2)   | 110.3(5) |
| O(5)#2-Rb(1)-O(4)#2 | 43.32(7)  | O(6)-B(2)-O(2)   | 105.9(3) |
| O(1)#1-Rb(1)-O(7)   | 114.07(8) | O(8)-B(3)-O(3)   | 126.1(7) |
| O(1)-Rb(1)-O(7)     | 104.45(8) | O(8)-B(3)-O(3)#3 | 118.7(5) |
| O(6)#2-Rb(1)-O(7)   | 135.95(7) | O(3)-B(3)-O(3)#3 | 115.2(3) |
| O(2)#1-Rb(1)-O(7)   | 68.01(6)  | O(7)-B(4)-O(5)   | 124.6(5) |
| O(3)-Rb(1)-O(7)     | 67.33(7)  | O(7)-B(4)-O(6)#1 | 119.6(4) |
| O(2)-Rb(1)-O(7)     | 58.73(6)  | O(5)-B(4)-O(6)#1 | 115.7(3) |
| O(5)#2-Rb(1)-O(7)   | 150.93(7) |                  |          |
| O(4)#2-Rb(1)-O(7)   | 165.44(7) |                  |          |

---

Note. Symmetry transformations used to generate equivalent atoms:

|                           |                            |                          |
|---------------------------|----------------------------|--------------------------|
| #1 $x, y, z+1$            | #2 $x, y-1/2, z+1/2$       | #3 $-x+1, -y+1/2, z+1/2$ |
| #4 $-x+1/2, y-1/2, z-1/2$ | #5 $x, y-1/2, z-1/2$       | #6 $-x+1/2, y, z-1$      |
| #7 $x, y, z-1$            | #8 $-x+1/2, y, z$          | #9 $-x+1, -y+1/2, z-1/2$ |
| #10 $x, y+1/2, z-1/2$     | #11 $-x+1, -y+1, z$        | #12 $-x+1, -y, z$        |
| #13 $x, y+1/2, z+1/2$     | #14 $-x+1/2, y+1/2, z-1/2$ |                          |

**Table S2.** Bond valence analysis of the  $\text{Li}_5\text{Rb}_2\text{B}_7\text{O}_{14}$ .<sup>a,b</sup>

| Atoms        | l        | s     | Atoms         | l         | s     |
|--------------|----------|-------|---------------|-----------|-------|
| Rb(1)-O(1)#1 | 2.919(6) | 0.170 | Li(1)-O(1)    | 1.874(8)  | 0.332 |
| Rb(1)-O(1)   | 2.967(6) | 0.149 | Li(1)-O(5)#11 | 1.935(8)  | 0.282 |
| Rb(1)-O(6)#2 | 2.978(3) | 0.145 | Li(1)-O(5)#12 | 1.935(8)  | 0.282 |
| Rb(1)-O(2)#1 | 3.093(3) | 0.106 | Li(1)-O(4)#2  | 1.967(18) | 0.258 |
| Rb(1)-O(3)   | 3.097(3) | 0.105 | $\sum s$      |           | 1.154 |
| Rb(1)-O(2)   | 3.099(3) | 0.104 | Li(2)-O(2)    | 2.574(8)  | 0.05  |
| Rb(1)-O(5)#2 | 3.123(3) | 0.098 | Li(2)-O(7)    | 1.930(10) | 0.285 |
| Rb(1)-O(4)#2 | 3.299(3) | 0.061 | Li(2)-O(6)    | 1.958(8)  | 0.265 |
| Rb(1)-O(7)   | 3.300(2) | 0.061 | Li(2)-O(8)#7  | 1.912(7)  | 0.300 |
| Rb(1)-O(8)   | 3.336(3) | 0.055 | Li(2)-O(8)#8  | 2.387(8)  | 0.083 |
| $\sum s$     |          | 1.054 | Li(2)-O(7)#5  | 2.479(10) | 0.065 |
| B(1)-O(1)    | 1.333(6) | 1.108 | $\sum s$      |           | 1.048 |
| B(1)-O(2)    | 1.390(4) | 0.950 | Li(3)-O(8)    | 1.915(11) | 0.297 |
| B(1)-O(2)#6  | 1.390(4) | 0.950 | Li(3)-O(3)#7  | 1.941(7)  | 0.277 |
| $\sum s$     |          | 3.008 | Li(3)-O(7)#7  | 1.942(6)  | 0.276 |
| B(2)-O(2)    | 1.483(4) | 0.739 | Li(3)-O(7)#12 | 1.947(6)  | 0.273 |
| B(2)-O(4)    | 1.447(4) | 0.814 | Li(3)-O(8)#5  | 2.574(11) | 0.05  |
| B(2)-O(5)    | 1.479(7) | 0.747 | $\sum s$      |           | 1.173 |
| B(2)-O(6)    | 1.481(6) | 0.743 | B(4)-O(5)     | 1.377(6)  | 0.984 |
| $\sum s$     |          | 3.043 | B(4)-O(7)     | 1.345(5)  | 1.073 |
| B(3)-O(3)    | 1.402(6) | 0.92  | B(4)-O(6)#1   | 1.394(7)  | 0.94  |
| B(3)-O(8)    | 1.294(5) | 1.231 | $\sum s$      |           | 2.997 |
| B(3)-O(3)#3  | 1.415(9) | 0.888 |               |           |       |

|          |  |       |  |  |  |
|----------|--|-------|--|--|--|
| $\sum s$ |  | 3.039 |  |  |  |
|----------|--|-------|--|--|--|

- <sup>a</sup> Bond valences calculated with the program Bond Valence Calculator Version 2.00, Hormillosa, C., Healy, S., Stephen, T. McMaster University (1993).
- <sup>b</sup> Valence sums calculated with the formula:  $S_i = \exp[(R_0 - R_i)/B]$ , where  $S_i$  = valence of bond "i" and  $B = 0.37$ . Superscripts indicate the number of equivalent bonds for anions.
